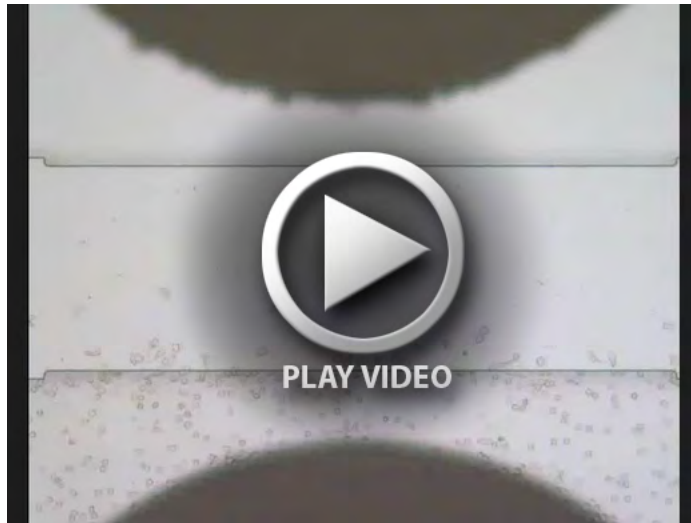

**Movie S1. fMLF-induced mouse neutrophil chemotaxis treated by DMSO.**

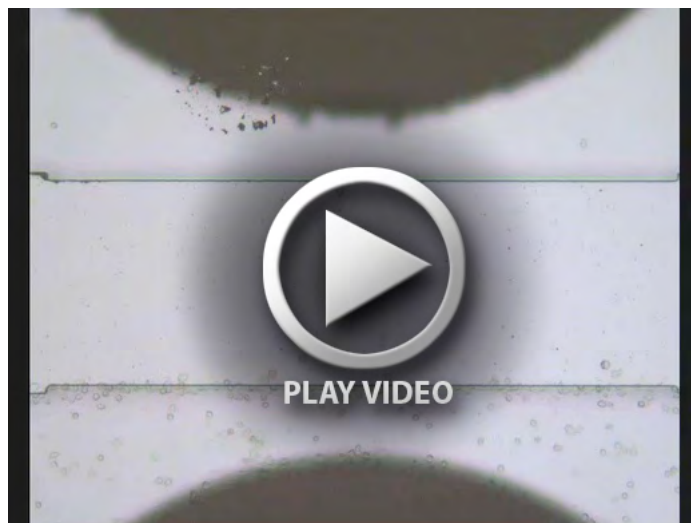

**Movie S2. Inhibitory effects of PF1052 on mouse neutrophil chemotaxis at 10  $\mu$ M.**

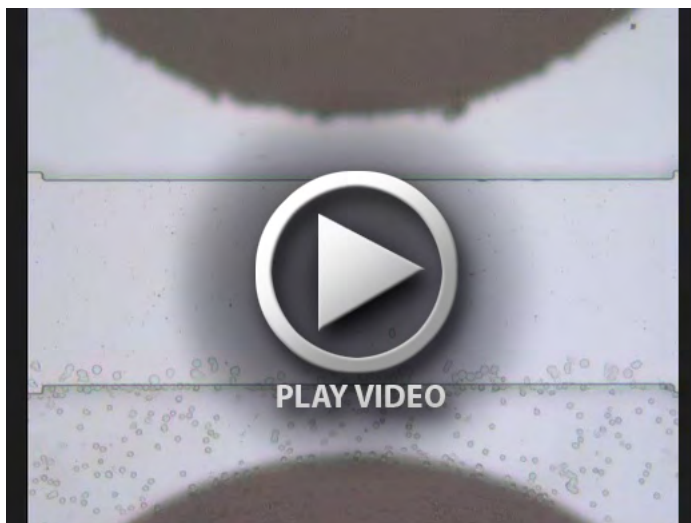

**Movie S3. Inhibitory effects of Sterigmatocystin on mouse neutrophil chemotaxis at 100  $\mu$ M.**

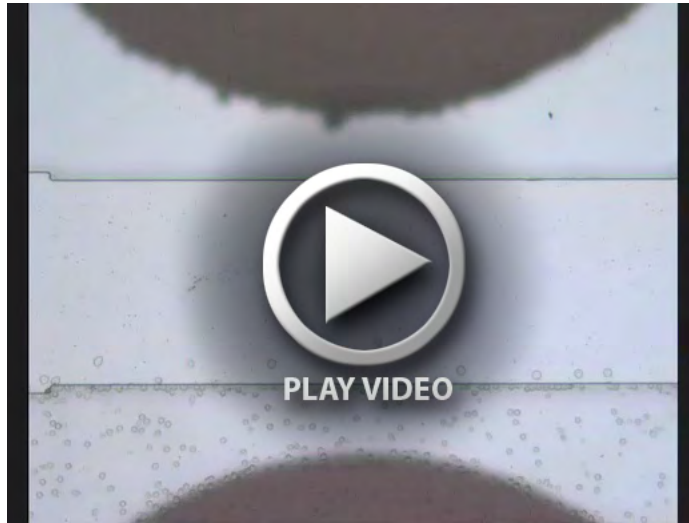

**Movie S4. At higher concentration (20  $\mu\text{M}$ ), most of PF1052 treated neutrophils remained stationary with a few outliers.**

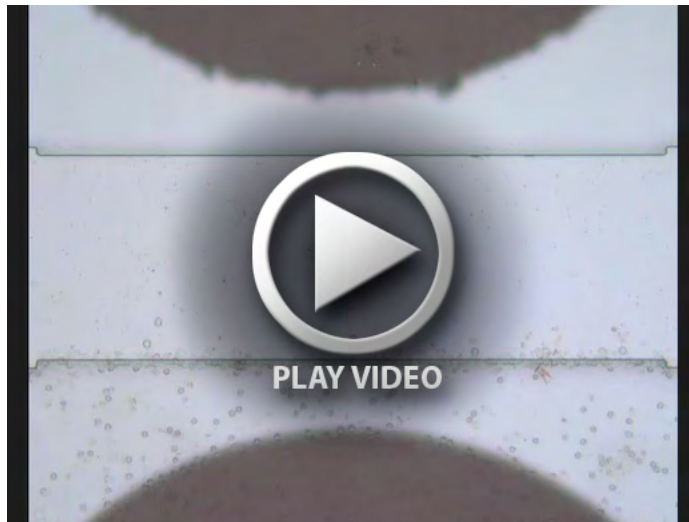

**Movie S5. Nearly all neutrophils treated by Sterigmatocystin at 200  $\mu\text{M}$  failed to migrate out.**

Supplementary Table S1. Natural product library ID and candidate hits.

| Plate ID | Candidate after one round of screening | Confirmed |
|----------|----------------------------------------|-----------|
| XF06-1   | A10, E07                               |           |
| XF06-2   | A08,A10,H08                            | A10       |
| XF06-3   | D08                                    |           |
| XF06-4   | D10                                    |           |
| XF06-5   | B03,B05 ,C05                           | B03       |
| XF06-6   | B05,B09                                |           |
| XF06-7   | G04                                    |           |
| XF06-8   |                                        |           |
| XF06-9   |                                        |           |
| XP06-1   | A10,D01,D02,D03 ,D04 ,D05              |           |
| XP06-2   | E04,E08,F04 ,F05,F06                   |           |
| XM01-1   | B2,B3,D5,F2,H2,H3,H4,H5                |           |
| MB01     | B1,B10,C6                              |           |

**Table S1. Natural product library ID and candidate hits.**
